# Supplementary material for: A porous GaN/MoO3 heterojunction for filter-free, ultra-narrowband ultraviolet photodetection
Source: Royal Society of Chemistry journal article supplement (doi:10.1039/d1tc05992k), 2022-01-01
Supplement: d1tc05992k1.pdf [file d1tc05992k1.pdf]

## Electronic Supplementary Information for

# Porous GaN/MoO<sub>3</sub> heterojunction for filter-free, ultra-narrowband ultraviolet photodetection

Yue Guo,<sup>a</sup> Weidong Song,<sup>\*a</sup> Qing Liu,<sup>b</sup> Yiming Sun,<sup>b</sup> Zhao Chen,<sup>a</sup> Xin He,<sup>a</sup> Qingguang

Zeng,<sup>a</sup> Xingjun Luo,<sup>c</sup> Ruiqing Zhang<sup>d</sup> and Shuti Li<sup>\*c</sup>

<sup>a</sup> College of Applied Physics and Materials, Wuyi University, Jiangmen 529020, Guangdong, P. R. China

<sup>b</sup> Guangdong Engineering Research Center of Optoelectronic Functional Materials and Devices, Institute of Semiconductors, South China Normal University, Guangzhou 510631, Guangdong, P. R. China

<sup>c</sup> Component Testing Center China Electronic Product Reliability and Environment Testing Research Institute, Guangzhou 510631, Guangdong, P. R. China

<sup>d</sup> School of Marxism, Guangdong Jiang Men Chinese Medical College, Jiangmen 529020, Guangdong, P. R. China

## Corresponding Authors

\*E-mail: [wdsongwyu@163.com](mailto:wdsongwyu@163.com); [lishuti@scnu.edu.cn](mailto:lishuti@scnu.edu.cn)

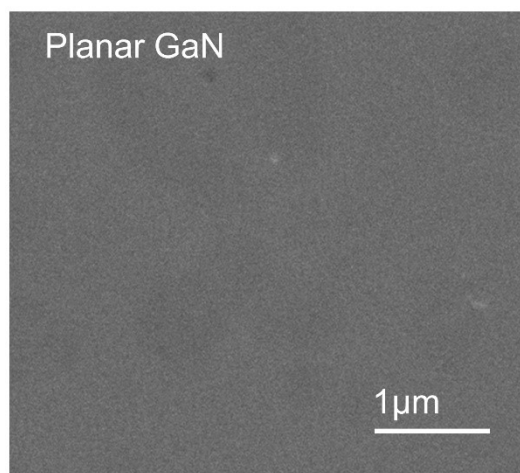

Figure S1. Surface SEM image of planar GaN.

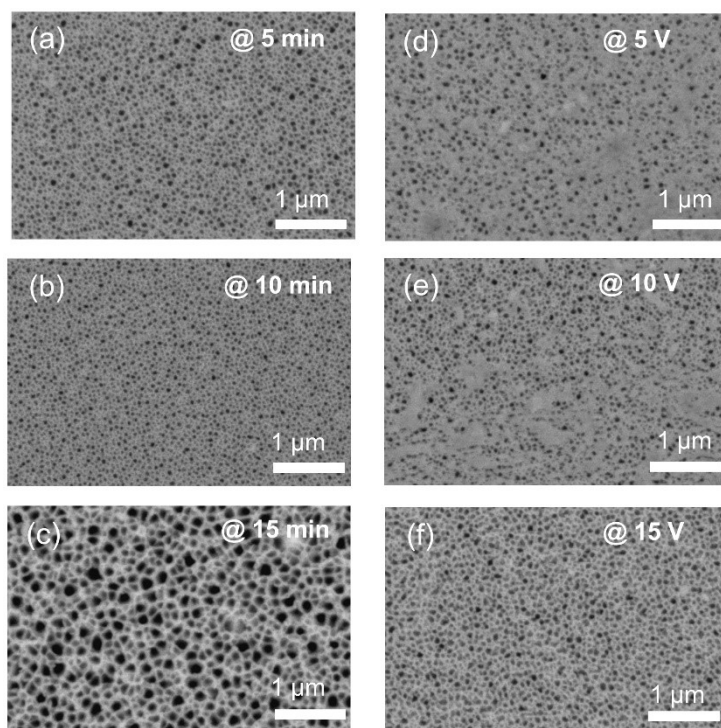

Figure S2. Surface SEM images of Po-GaN under different etching conditions. (a-c) Po-GaN etched under different etching times (5, 10 and 15 min) at a fixed bias of 15 V. (d-f) Po-GaN etched for 5 min under different etching voltages (5, 10 and 15 V).

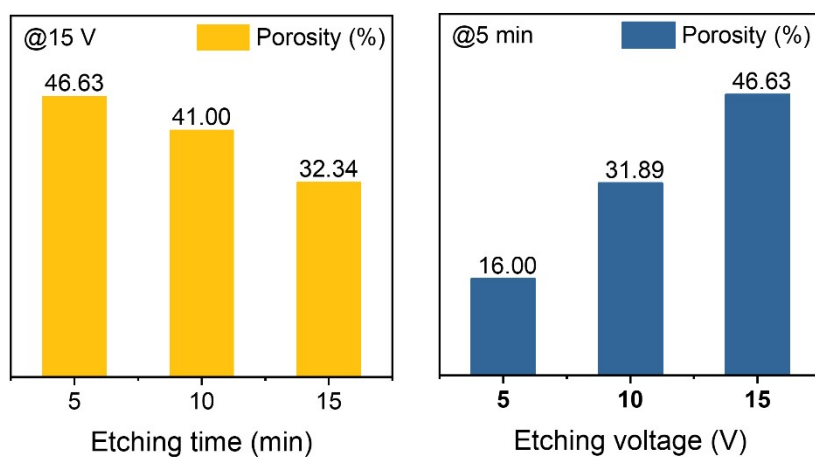

Figure S3. Etching (a) time and (b) voltage dependent porosity of Po-GaN.

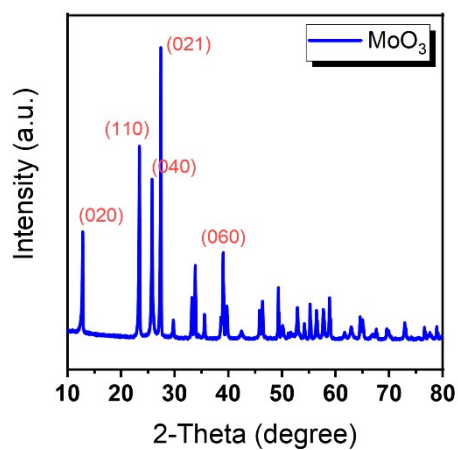

Figure S4. XRD patterns of the deposited  $\text{MoO}_3$  film. The diffraction peaks at  $12.8^\circ$ ,  $25.7^\circ$  and  $39.0^\circ$  are attributed to the (010) planes of the  $\text{MoO}_3$  structure. The peaks at  $23.3^\circ$  and  $27.4^\circ$  can be assigned to the (110) and (021) planes.

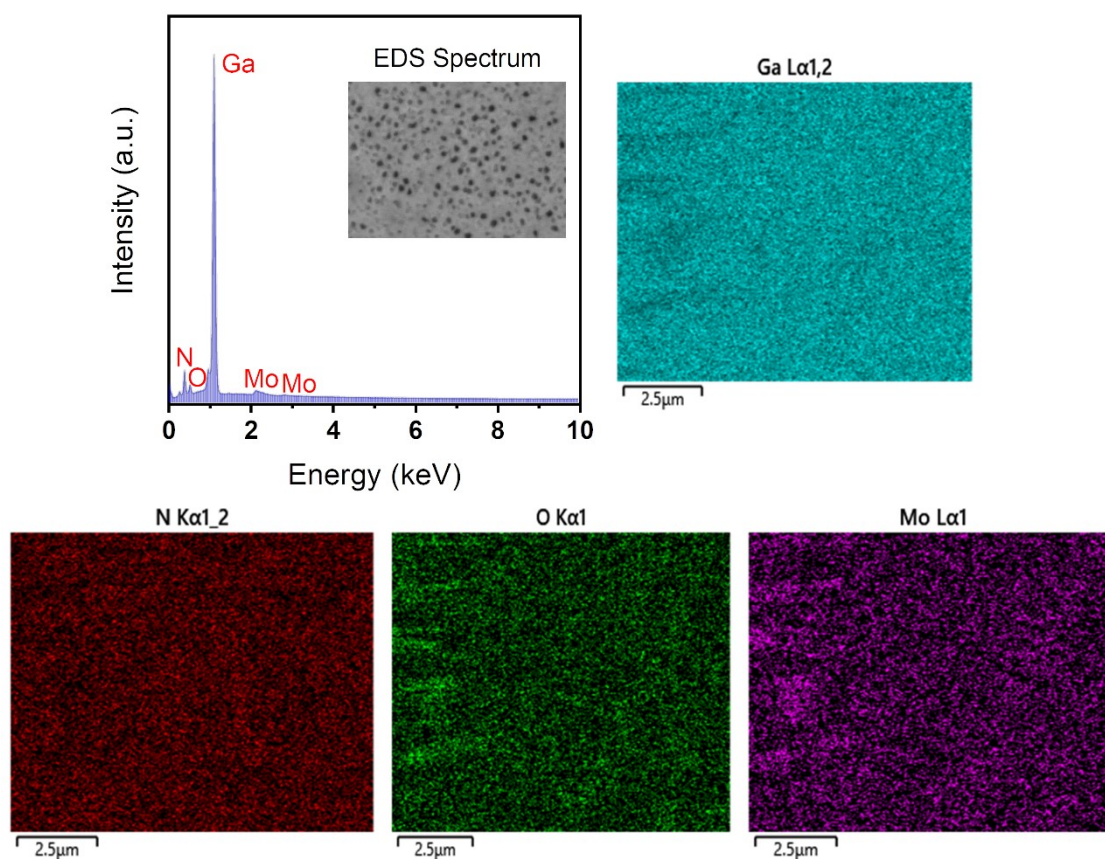

Figure S5. EDS analysis of the Po-GaN/MoO<sub>3</sub> heterojunction. The elements Ga, N, Mo, O are obviously observed.

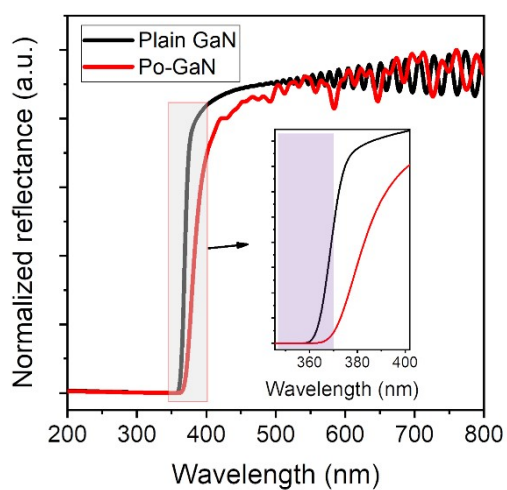

Figure S6. Normalized reflectance spectra of plain GaN and Po-GaN.

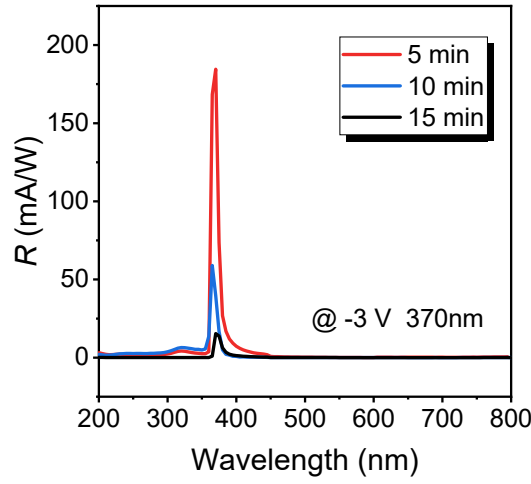

Figure S7. Etching times of Po-GaN dependent spectral response of the Po-GaN/MoO<sub>3</sub> PD.

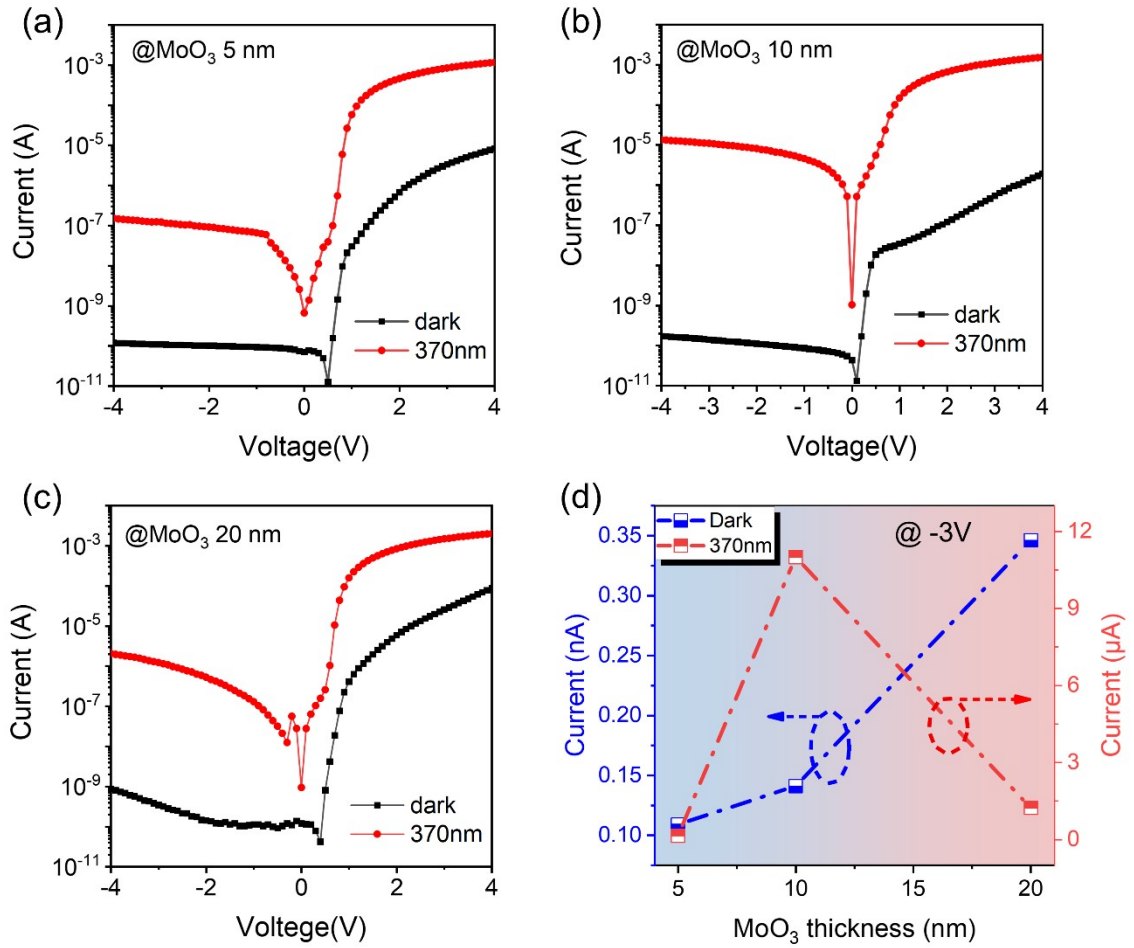

Figure S8. MoO<sub>3</sub> thickness dependent photoelectric properties of the Po-GaN/MoO<sub>3</sub> PDs. (a-c)  $I$ - $V$  characteristics under dark and UV illumination. (d) Photocurrent and dark current as a function of the MoO<sub>3</sub> thickness.

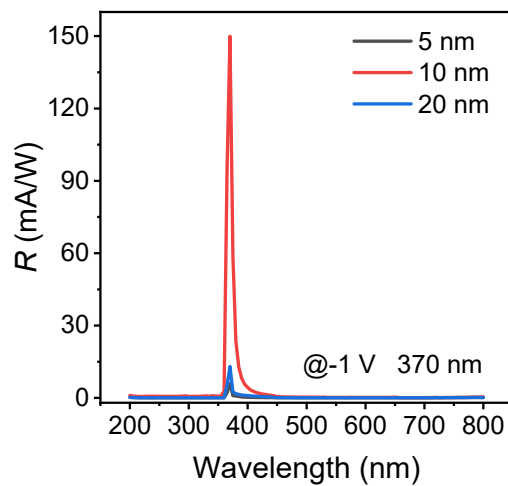

Figure S9. MoO<sub>3</sub> thickness dependent spectral response of the Po-GaN/MoO<sub>3</sub> PD.

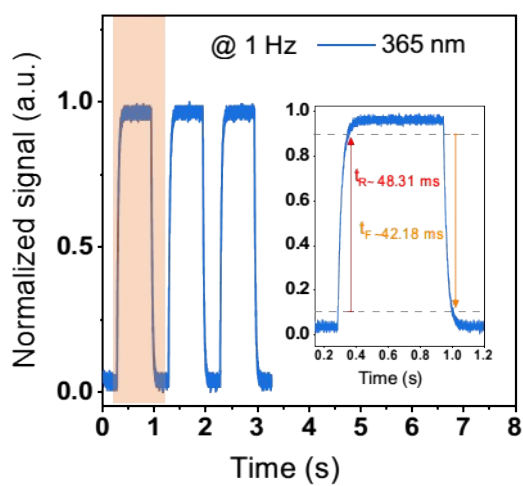

Figure S10. Typical pulse response of a Po-GaN/MoO<sub>3</sub> PD to a 365 nm LED. The inset shows a single pulse optical response extracted to evaluate the response speed.
